# Supplementary material for: Nanogrooved microdiscs for bottom-up modulation of osteogenic differentiation
Source: Royal Society of Chemistry journal article supplement (doi:10.1039/c9nr06267j), 2019-01-01
Supplement: c9nr06267j1.pdf [file c9nr06267j1.pdf]

## SUPPORTING INFORMATION

### Nanogrooved microdiscs for bottom-up modulation of osteogenic differentiation

Isabel M. Bjørge, Insung S. Choi, Clara R. Correia,<sup>†</sup> and João F. Mano<sup>†</sup>

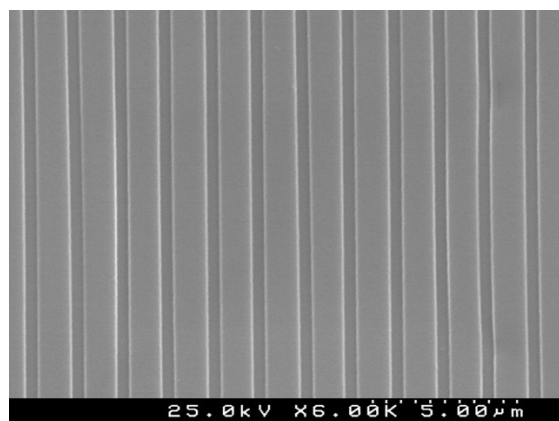

**Figure S1.** SEM image of topography of the used optical media substrate (CD).

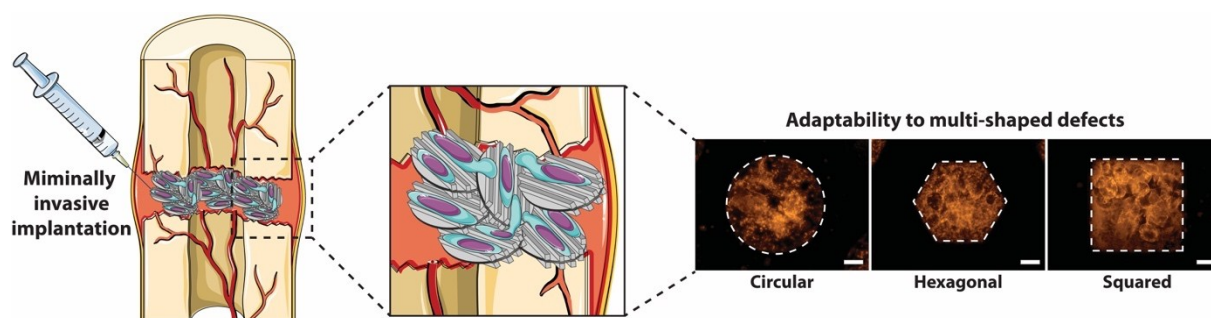

**Figure S2.** Schematic representation of the potential of topodiscs as injectable cell-carriers for bone regeneration upon fracture due to their adaptability to multi-shaped defects. Right: topodisc-cell aggregates acquire the shape of 2D patterned regions with circular, hexagonal, and squared geometries. Scale bars correspond to 200 μm.
